# Supplementary material for: Broad Anatomical Variation within a Narrow Wood Density Range—A Study of Twig Wood across 69 Australian Angiosperms
Source: PLoS One. 2015 Apr 23;10(4):e0124892. doi: 10.1371/journal.pone.0124892 (PMC4408027; doi:10.1371/journal.pone.0124892)
Supplement: S2 Table — (XLSX) [file pone.0124892.s006.xlsx]

## Sheet: Info
This spreadsheet contains 22 plant traits: 17 wood anatomical traits, wood density, height, maximum height, leaf area to sapwood area ratio and modulus of elasticity measured on 69 species collected from three locations along the east cost of Australia.
For each tree or shrub species three replicates were masured (except for four species with four, two or one replicate).
no asterisk	three replicates
*	one replicate
**	two replicates
***	four replicates
One species, Pimelea linifolia, occurred in two locations and is treated as two separate entities giving rise to 69 species-at-sites.
Additional six traits were measured/calculated, however, they were not analysed in the study. These are indicated at the highlighted top row (cells AX-BI).

## Sheet: Data
					Data from Zieminska, Wright & Westoby																																												Traits measured or calculated but analyses not included in Zieminska, Wright & Westoby
Site	Vegetation type		Family	Number of replicates	Axial parenchyma fraction	Axial parenchyma fraction	Rays fraction	Rays fraction	Total parenchyma (axial+ray) fraction	Total parenchyma (axial+ray) fraction	Fibre lumen fraction	Fibre lumen fraction	Fibre wall fraction	Fibre wall fraction	Total fibre (lumen+wall) fraction	Total fibre (lumen+wall) fraction	Vessel lumen fraction	Vessel lumen fraction	Vessel wall fraction	Vessel wall fraction	Total vessel (lumen+wall) fraction	Total vessel (lumen+wall) fraction	Conduits15µm fraction	Conduits15µm fraction	Mucilage canals fraction	Mucilage canals fraction	Wall (fibre wall+vessel wall) fraction	Wall (fibre wall+vessel wall) fraction	Vessel area (mm2)	Vessel area (mm2)	Vessel number per mm2	Vessel number per mm2	Vessel area to number ratio (mm4)	Vessel area to number ratio (mm4)	Hydraulically weighted diameter (mm)	Hydraulically weighted diameter (mm)	Pith area (mm2)	Pith area (mm2)	Wood density (g cm-3)	Wood density (g cm-3)	Height (m)	Height (m)	Maximum height (m)	Leaf area/sapwod area (cm2 cm-2)	Leaf area/sapwod area (cm2 cm-2)	Modulus of elasticity (MPa)	Modulus of elasticity (MPa)		Fibre wall fraction/(fibre lumen+fibre wall fraction)
					average	standard deviation	average	standard deviation	average	standard deviation	average	standard deviation	average	standard deviation	average	standard deviation	average	standard deviation	average	standard deviation	average	standard deviation	average	standard deviation	average	standard deviation	average	standard deviation	average	standard deviation	average	standard deviation	average	standard deviation	average	standard deviation	average	standard deviation	average	standard deviation	average	standard deviation	na	average	standard deviation	average	standard deviation		average
Cape Tribulation	Tropical rainforest	Antirhea tenuiflora	Rubiaceae	3	0.132823	0.0240973	0.279358	0.0412986	0.412181	0.0174478	0.0264349	0.0103323	0.302781	0.0270201	0.329216	0.02973	0.182265	0.0190822	0.0763383	0.024409	0.258603	0.0398242	not observed	na	not observed	na	0.379119	0.0111601	0.000660325	4.195e-05	278.04	47.9811	2.43503e-06	5.22423e-07	34.4	0.860999	1.95606	0.593483	0.57373	0.0340038	12.8667	1.92959	12.87	7327.82	2353.72	7525.8	414.895		0.920152
Cape Tribulation	Tropical rainforest	Argyrodendron peralatum	Sterculiaceae	3	0.319618	0.0308706	0.270323	0.0612298	0.589941	0.0303779	0.0198952	0.00294979	0.193114	0.0235497	0.213009	0.0260921	0.139189	0.040351	0.0578611	0.0138715	0.19705	0.0300834	not observed	na	not observed	na	0.250975	0.0223947	0.00161715	0.000462479	89.0726	29.1173	2.02882e-05	1.17844e-05	63.726	6.05077	1.80647	0.962111	0.577522	0.00419811	33.6333	2.63881	33.63	14025.6	3350.96	2383.55	494.526		0.906649
Cape Tribulation	Tropical rainforest	Austromuellera trinervia	Proteaceae	3	0.174783	0.0171891	0.347829	0.0879591	0.522612	0.101055	0.0704728	0.0478175	0.22288	0.0581338	0.293353	0.0864	0.145272	0.00759552	0.0306371	0.0106682	0.175909	0.0167942	0.00812521	0.00590201	not observed	na	0.253517	0.0624866	0.00172284	0.000417174	87.1722	18.3263	2.11806e-05	1.02989e-05	58.4519	3.28963	72.589	5.18323	0.463742	0.0075664	18.6667	2.0502	18.67	15561.2	946.464	3782.42	783.368		0.76828
Cape Tribulation	Tropical rainforest	Brombya platynema	Rutaceae	3	0.0870889	0.0605721	0.279547	0.0192751	0.366636	0.044526	0.144968	0.0167999	0.365649	0.0533667	0.510618	0.0368088	0.0893238	0.0217511	0.0334222	0.00488753	0.122746	0.0182044	not observed	na	not observed	na	0.399072	0.0493078	0.000749717	0.000101611	119.197	22.9389	6.47428e-06	1.63994e-06	38.0196	2.82025	3.34585	4.06619	0.563575	0.0308598	9.4	2.00749	9.4	9586.81	4663.57	5105.99	715.531		0.713542
Cape Tribulation	Tropical rainforest	Cardwellia sublimis	Proteaceae	3	0.283192	0.047719	0.37905	0.0273011	0.662242	0.0397886	0.0478174	0.00837827	0.15123	0.0290288	0.199047	0.0337295	0.110906	0.0141562	0.0278041	0.00208584	0.13871	0.0156378	not observed	na	not observed	na	0.179034	0.0309416	0.00186889	0.000306832	60.8189	14.4319	3.3026e-05	1.45952e-05	55.5006	2.2316	3.01195	0.24412	0.468626	0.0261887	27.3	2.16333	30	7397.1	1567.15	3646.23	157.963		0.75811
Cape Tribulation	Tropical rainforest	Casearia dallachii	Salicaceae	3	0.0276104	0.0145539	0.347765	0.0353138	0.375376	0.0301051	0.213753	0.0305987	0.257734	0.0722893	0.471487	0.0432541	0.116583	0.015814	0.0365538	0.00785977	0.153137	0.0165789	not observed	na	not observed	na	0.294288	0.0754287	0.000760303	0.000253419	159.592	28.369	5.08107e-06	2.70422e-06	35.5765	4.93071	3.04211	1.85077	0.504823	0.0582792	2.73333	0.152753	8	15242.2	6476.59	4311.1	736.916		0.540081
Cape Tribulation	Tropical rainforest	Castanospermum australe	Fabaceae	3	0.277588	0.104931	0.258122	0.0658838	0.53571	0.0638863	0.137285	0.0199077	0.230686	0.082264	0.367971	0.0657215	0.0776967	0.00649629	0.0186228	0.00264069	0.0963195	0.00873705	not observed	na	not observed	na	0.249308	0.0808069	0.00264708	0.00117144	34.0262	16.0028	0.000106367	9.59132e-05	70.3946	17.2567	19.5656	14.5503	0.431204	0.0356823	30.8333	1.96044	40	11538.6	3347.81	2789.8	393.073		0.614851
Cape Tribulation	Tropical rainforest	Cleistanthus myrianthus	Euphorbiaceae	3	0.0875739	0.0112705	0.26582	0.0335513	0.353394	0.0295227	0.105172	0.0088359	0.331205	0.0499697	0.436377	0.0475728	0.150059	0.0485433	0.0601697	0.00550156	0.210229	0.0508761	not observed	na	not observed	na	0.391375	0.0518257	0.000927425	0.000146911	159.045	31.3891	5.87484e-06	5.8565e-07	39.0338	2.91853	1.58368	0.547915	0.536949	0.0549446	17.4667	3.99291	17.47	7497.24	2591.05	6413.25	507.7		0.756863
Cape Tribulation	Tropical rainforest	Cryptocarya grandis	Lauraceae	3	0.151242	0.00970919	0.213251	0.0200248	0.364493	0.0272696	0.166341	0.0208221	0.297505	0.049329	0.463847	0.0612865	0.132722	0.02146	0.0389379	0.0143796	0.17166	0.0354122	not observed	na	not observed	na	0.336443	0.035936	0.0019578	0.000161742	68.7356	17.1434	2.99996e-05	9.18857e-06	66.0481	4.32124	2.90087	0.71483	0.56392	0.0256037	24.6667	1.45717	35	11425.6	3802.72	4624.26	679.867		0.63975
Cape Tribulation	Tropical rainforest	Cryptocarya mackinnoniana	Lauraceae	3	0.162966	0.0557864	0.275769	0.0495786	0.438735	0.103703	0.138029	0.0564895	0.273864	0.0610561	0.411892	0.114075	0.0937064	0.0327579	0.0427302	0.02362	0.136437	0.015487	not observed	na	0.0129359	0.0205112	0.316594	0.0395413	0.00182659	0.000483226	50.6002	4.46365	3.5799e-05	6.85354e-06	61.9639	6.14411	13.0277	6.14162	0.608193	0.0152639	20.3	0.781025	25	4543.43	602.456	5483.69	2287.1		0.674493
Cape Tribulation	Tropical rainforest	Cryptocarya murrayi	Lauraceae	3	0.19457	0.0451706	0.244439	0.0894018	0.439009	0.0450884	0.131087	0.0151873	0.238558	0.00613341	0.369645	0.00911137	0.140638	0.0296477	0.0313466	0.00727031	0.171985	0.0357424	not observed	na	0.0193616	0.0200823	0.269905	0.0131672	0.0021281	7.69124e-05	66.1798	14.114	3.3334e-05	8.45893e-06	66.9813	5.95943	10.0363	4.36529	0.473771	0.0387164	19.0333	2.76104	30	9398.37	2783.91	3725.16	690.309		0.6459
Cape Tribulation	Tropical rainforest	Doryphora aromatica	Monimiaceae	3	0.0126695	0.00625802	0.231821	0.0435979	0.244491	0.0390453	0.110861	0.0158543	0.374118	0.0522795	0.484979	0.0666792	0.206272	0.0235342	0.064258	0.0232704	0.27053	0.0372798	not observed	na	not observed	na	0.438376	0.0457201	0.000626008	9.2402e-05	335.875	70.7606	1.9705e-06	7.69621e-07	32.1147	2.93239	0.489198	0.125078	0.536019	0.0275884	19.6667	4.10406	40	10216.2	3635.19	5474.48	1351.2		0.7714
Cape Tribulation	Tropical rainforest	Dysoxylum alliaceum	Meliaceae	3	0.276165	0.0471573	0.21788	0.056757	0.494045	0.0728694	0.106515	0.0209076	0.258004	0.0685853	0.364519	0.0885164	0.102307	0.0213736	0.0391281	0.00444168	0.141435	0.0170102	not observed	na	not observed	na	0.297133	0.0725276	0.00194062	0.000222641	52.3276	5.11778	3.70442e-05	6.43942e-07	63.7678	4.0059	10.1694	8.95285	0.429966	0.0454507	19.8333	0.404145	38	11001.3	1727.86	4078.92	1571.37		0.70545
Cape Tribulation	Tropical rainforest	Dysoxylum arborescens	Meliaceae	3	0.218331	0.0311119	0.222165	0.0578173	0.440497	0.0330362	0.118295	0.044947	0.291534	0.0543018	0.409829	0.0532442	0.124461	0.0572285	0.0252137	0.00280232	0.149674	0.0595452	not observed	na	not observed	na	0.316748	0.0525211	0.00110765	0.000214354	110.392	34.4108	1.06003e-05	3.57814e-06	45.7802	3.9937	5.89447	2.2623	0.527587	0.0254667	16.7333	3.55715	30	10665.9	351.477	4455.13	362.139		0.711272
Cape Tribulation	Tropical rainforest	Dysoxylum papuanum	Meliaceae	3	0.153416	0.012733	0.234621	0.0261752	0.388037	0.0281957	0.125961	0.0124094	0.278338	0.0373407	0.4043	0.0457125	0.156093	0.0237332	0.0515708	0.00579854	0.207664	0.0199292	not observed	na	not observed	na	0.329909	0.04282	0.00128806	2.75245e-05	121.468	21.084	1.08301e-05	1.95363e-06	48.8966	2.86043	4.35082	1.32229	0.524585	0.0748672	30.5667	1.35031	30.57	9264.78	1309.54	5040.09	1430.81		0.687417
Cape Tribulation	Tropical rainforest	Dysoxylum parasiticum***	Meliaceae	4	0.10502	0.0108823	0.201254	0.0309023	0.306274	0.0361487	0.208394	0.0493635	0.302619	0.00438715	0.511013	0.0528925	0.155229	0.0222868	0.0274841	0.00538178	0.182713	0.0206785	not observed	na	not observed	na	0.330103	0.00780944	0.00362026	0.000927282	44.0399	7.55373	8.64353e-05	3.63852e-05	83.3687	5.88118	17.4308	4.20166	0.440035	0.062733	12.6	2.24648	20	22164.1	8603.63	3882	535.185		0.596188
Cape Tribulation	Tropical rainforest	Dysoxylum pettigrewianum***	Meliaceae	4	0.243688	0.0274371	0.190177	0.0384152	0.433865	0.0294449	0.100359	0.0359895	0.220476	0.0404029	0.320835	0.0321409	0.196964	0.0633925	0.0483356	0.0126463	0.2453	0.0592942	not observed	na	not observed	na	0.268812	0.0404461	0.00183997	0.000277309	112.735	51.7685	2.03518e-05	1.25809e-05	58.4273	5.53955	16.7523	5.64213	0.458787	0.0420918	24.525	0.75	24.53	17810.7	8019.93	3864.32	1250.89		0.687849
Cape Tribulation	Tropical rainforest	Elaeocarpus grandis	Elaeocarpaceae	3	0.0376988	0.00308025	0.264957	0.0481718	0.302655	0.0462387	0.218799	0.0415915	0.275608	0.0481565	0.494407	0.00968709	0.16412	0.0500414	0.0388174	0.00325635	0.202937	0.0529685	not observed	na	not observed	na	0.314425	0.0493775	0.00199858	0.000275321	80.9457	16.2376	2.49688e-05	2.8154e-06	65.9953	5.1061	3.21694	1.09364	0.445282	0.0213538	30.0333	2.90918	32.8	8643.12	759.386	3674.26	727.412		0.556654
Cape Tribulation	Tropical rainforest	Endiandra leptodendron	Lauraceae	3	0.126268	0.0709969	0.23002	0.0510622	0.356288	0.121168	0.141742	0.0140554	0.356809	0.117778	0.498551	0.104144	0.120629	0.0154627	0.024532	0.00419969	0.145161	0.0170546	not observed	na	not observed	na	0.381341	0.119746	0.00151136	0.000194063	80.4549	12.2327	1.92203e-05	4.55424e-06	54.9337	2.55247	8.8618	7.56174	0.573831	0.0158543	15.2333	2.35018	18	13767.8	3782.21	5995.08	1549.27		0.702221
Cape Tribulation	Tropical rainforest	Endiandra microneura	Lauraceae	3	0.147634	0.0274762	0.225517	0.0214175	0.373151	0.0293186	0.0929279	0.010113	0.32432	0.0192608	0.417248	0.0156203	0.142832	0.0386074	0.0667683	0.0114101	0.2096	0.0272198	not observed	na	not observed	na	0.391089	0.0284295	0.00157018	0.000343745	91.8136	22.2	1.7927e-05	6.84894e-06	53.4224	3.39767	3.06227	2.41317	0.613212	0.054381	25.5333	1.35769	30	8443.15	4895.12	3893.62	224.185		0.777026
Cape Tribulation	Tropical rainforest	Eupomatia laurina	Eupomatiaceae	3	0.058983	0.0340908	0.340313	0.0352566	0.399296	0.0166918	0.0948502	0.0233338	0.283342	0.0178425	0.378192	0.032462	0.157865	0.01108	0.0646465	0.0137481	0.222511	0.0248271	not observed	na	not observed	na	0.347988	0.0193415	0.00107369	2.30513e-05	147.045	10.0737	7.32648e-06	5.62493e-07	42.7934	1.15433	23.6432	12.2249	0.497251	0.0218237	7.2	3.41174	8	11976	5182.6	6522.71	1445.58		0.750849
Cape Tribulation	Tropical rainforest	Ficus variegata	Moraceae	3	0.190447	0.0415272	0.171396	0.0479692	0.361843	0.0731459	0.221526	0.0609559	0.252645	0.00438386	0.474172	0.0648022	0.134909	0.0314098	0.0290767	0.00655348	0.163985	0.0282633	not observed	na	not observed	na	0.281722	0.0109371	0.00311424	0.000453985	44.6301	14.7906	7.89033e-05	4.13132e-05	77.4775	5.1268	8.42193	2.3833	0.409041	0.0136167	16.1	1.73494	20	6640.11	2537.24	4655.01	1138.33		0.5391
Cape Tribulation	Tropical rainforest	Gillbeea whypallana	Cunnoniaceae	3	0.0820055	0.0245328	0.206832	0.0190066	0.288838	0.0257209	0.165353	0.0237571	0.250018	0.0597941	0.415371	0.0368327	0.232837	0.00792038	0.0629548	0.00380205	0.295792	0.0114359	not observed	na	not observed	na	0.312973	0.0562964	0.00126631	0.000358157	194.347	55.6624	7.19393e-06	3.60182e-06	43.82	6.44123	3.90113	1.37521	0.421505	0.0846642	19.1333	4.32474	20	6930.11	2804.91	4376.18	270.609		0.59677
Cape Tribulation	Tropical rainforest	Gomphandra australiana	Icacinaceae	3	0.176697	0.0196499	0.376155	0.117658	0.552853	0.137307	0.0486043	0.0125909	0.297454	0.112039	0.346058	0.123102	0.08157	0.0178134	0.0195194	0.0105593	0.101089	0.0282695	not observed	na	not observed	na	0.316973	0.115283	0.00195897	0.00028614	41.6311	6.53968	4.78462e-05	1.08947e-05	56.8583	6.21035	5.2968	3.5171	0.463286	0.01954	10	7.14213	20	9030.14	2796.02	4722.3	520.848		0.855308
Cape Tribulation	Tropical rainforest	Haplostichanthus ramiflorus	Annonaceae	3	0.19366	0.002585	0.262234	0.0565711	0.455894	0.0573342	0.0800236	0.0278747	0.363188	0.0504542	0.443212	0.0310477	0.0630464	0.0146856	0.0378481	0.0151056	0.100894	0.0294949	not observed	na	not observed	na	0.401036	0.065098	0.000945643	0.000474005	83.5033	58.5893	1.68547e-05	1.26163e-05	42.5561	13.358	1.09725	0.523481	0.569845	0.00998198	2.46667	0.152753	4	8636.1	2901.16	4865.11	1714.24		0.817365
Cape Tribulation	Tropical rainforest	Harpullia rhyticarpa	Sapindaceae	3	0.1096	0.0353124	0.202242	0.0311803	0.311842	0.0203279	0.0975515	0.0154233	0.453555	0.0710897	0.551107	0.0568793	0.0959883	0.0281543	0.0410629	0.011048	0.137051	0.038891	not observed	na	not observed	na	0.494618	0.0600997	0.000936361	0.000214262	101.613	9.46825	9.18782e-06	1.79919e-06	43.8363	4.17479	4.12858	0.828158	0.608347	0.0228974	5.03333	3.10698	6	16659.3	3773.37	7625.27	944.821		0.820152
Cape Tribulation	Tropical rainforest	Hernandia albiflora	Hernandiaceae	3	0.145793	0.0526047	0.219355	0.037357	0.365148	0.038832	0.20861	0.0769911	0.330406	0.00688052	0.539016	0.0703978	0.0698189	0.0194461	0.0260167	0.0153661	0.0958357	0.0340235	not observed	na	not observed	na	0.356423	0.0206714	0.0014364	0.00018744	49.4655	15.4697	3.21811e-05	1.56006e-05	56.6734	6.87165	4.91413	2.74867	0.463181	0.0541468	5.23333	0.750555	15	11603.7	3419.67	5606.36	1630.53		0.621498
Cape Tribulation	Tropical rainforest	Leea indica	Vitaceae	3	0.0217162	0.00955405	0.408612	0.0443554	0.430328	0.040026	0.197835	0.0213876	0.221434	0.043758	0.419269	0.0341894	0.126281	0.0174648	0.0241227	0.0162276	0.150403	0.00602963	not observed	na	not observed	na	0.245557	0.0427086	0.00307768	0.000481875	41.5092	6.7245	7.65766e-05	2.42619e-05	75.2077	6.01463	50.3483	21.0252	0.395644	0.0165752	3.83333	0.986577	3.83	24903.8	20077.2	5141.58	1514.82		0.525397
Cape Tribulation	Tropical rainforest	Litsea leefeana	Lauraceae	3	0.0402656	0.0232979	0.187648	0.0229027	0.227914	0.0233584	0.190154	0.0398499	0.349807	0.0528677	0.539961	0.0483709	0.16376	0.052391	0.0581053	0.00952922	0.221865	0.0565093	not observed	na	0.00877193	0.0151934	0.407912	0.0530238	0.00166988	0.000485455	105.757	56.1824	1.94225e-05	1.07675e-05	53.6009	5.45037	4.93536	4.06383	0.515437	0.0337711	22.9667	1.6563	30	13298.7	4383.36	4566.82	1699.9		0.647327
Cape Tribulation	Tropical rainforest	Mallotus paniculatus	Euphorbiaceae	3	0.0787626	0.0159846	0.20977	0.0609551	0.288532	0.0578547	0.199121	0.0718499	0.272186	0.0265958	0.471307	0.0980626	0.195948	0.0235566	0.0442132	0.0175391	0.240161	0.0405376	not observed	na	not observed	na	0.316399	0.0104164	0.00328423	0.00129812	67.9975	31.979	6.52883e-05	5.69695e-05	81.8652	12.9963	4.83201	1.89913	0.454329	0.0500588	20.0333	3.32014	20	10457	2512.39	6076.03	245.908		0.586222
Cape Tribulation	Tropical rainforest	Melicope xanthoxyloides	Rutaceae	3	0.0998137	0.0121155	0.211354	0.00860581	0.311168	0.00506125	0.181497	0.0441846	0.268041	0.0207366	0.449538	0.0607956	0.193427	0.0392108	0.0458664	0.021755	0.239294	0.0593065	not observed	na	not observed	na	0.313908	0.00304473	0.00201777	0.000188503	95.8828	18.4765	2.15497e-05	4.23606e-06	61.9444	4.90637	17.9832	1.52964	0.429531	0.0144804	11.3333	4.50925	11.33	17137.9	11172.8	5181.96	717.726		0.599674
Cape Tribulation	Tropical rainforest	Musgravea heterophylla	Proteaceae	3	0.208895	0.0400355	0.262335	0.0251595	0.471231	0.058174	0.166952	0.0211047	0.170515	0.0476085	0.337468	0.0296794	0.153216	0.0274522	0.0324562	0.00584194	0.185673	0.0332443	0.00562886	0.00210578	not observed	na	0.202971	0.0521135	0.00143876	0.00043631	109.664	21.2169	1.38654e-05	6.71313e-06	52.0427	7.93976	9.68579	6.95518	0.448735	0.0452816	24.5333	2.64071	30	5855.68	2098.93	2587.04	373.968		0.50022
Cape Tribulation	Tropical rainforest	Myristica globosa	Myristicaceae	3	0.123198	0.00832097	0.229517	0.0324928	0.352715	0.0271819	0.230331	0.0652168	0.261817	0.0488453	0.492148	0.028596	0.118907	0.00849582	0.0362299	0.00832863	0.155137	0.0164108	not observed	na	not observed	na	0.298047	0.0569869	0.00232411	0.000175472	51.5458	7.64267	4.60745e-05	1.00349e-05	65.3365	3.95348	1.8821	0.477618	0.446156	0.0344762	22.9667	6.30582	25	6342.74	1644.19	2746.41	663.608		0.534744
Cape Tribulation	Tropical rainforest	Palaquium galactoxylum**	Sapotaceae	2	0.134058	0.00512396	0.243961	0.0580716	0.378019	0.0529476	0.172101	0.0435537	0.30314	0.0734435	0.475242	0.0298898	0.111715	0.0418457	0.0350242	0.0187879	0.146739	0.0230578	not observed	na	not observed	na	0.338164	0.0546556	0.00198394	0.000293751	55.3549	12.8961	3.62047e-05	3.128e-06	62.9092	8.61262	2.73711	1.23845	0.503622	0.0259329	23.65	7.70746	23.65	10373.2	2042.57	2688.07	989.537		0.63426
Cape Tribulation	Tropical rainforest	Pouteria xerocarpa*	Sapotaceae	1	0.223881	na	0.278607	na	0.502488	na	0.134328	na	0.208955	na	0.343284	na	0.124378	na	0.0298507	na	0.154229	na	not observed	na	not observed	na	0.238806	na	0.000905216	na	137.402	na	6.58811e-06	na	48.7822	na	2.99708	na	0.516086	na	6	na	7.33	7179.49	na	6597.16	na		0.608696
Cape Tribulation	Tropical rainforest	Rockinghamia angustifolia	Euphorbiaceae	3	0.109045	0.0153308	0.22281	0.0213886	0.331855	0.0326492	0.164226	0.0306559	0.336367	0.0836404	0.500593	0.0535069	0.127501	0.0307987	0.0400506	0.00747864	0.167552	0.0355486	not observed	na	not observed	na	0.376417	0.0835836	0.00140467	4.46794e-05	90.3861	19.111	1.59681e-05	3.07452e-06	55.5669	2.36892	2.54935	1.48722	0.448666	0.0113392	16.6333	1.75024	16.63	7694.4	1296.4	4183.15	1179.89		0.664684
Cape Tribulation	Tropical rainforest	Syzygium graveolens	Myrtaceae	3	0.287276	0.0516414	0.154274	0.0365418	0.44155	0.0282526	0.0815547	0.032274	0.256377	0.0376056	0.337931	0.0173784	0.166411	0.00470007	0.0541074	0.00806504	0.220519	0.0111696	not observed	na	not observed	na	0.310484	0.0452443	0.00135311	0.000292741	126.273	23.1678	1.12679e-05	4.59709e-06	49.6416	2.9471	1.33586	0.836552	0.543541	0.0537724	30.0667	2.14554	30.07	7621.73	2388.07	1633.55**	853.892		0.757933
Cape Tribulation	Tropical rainforest	Syzygium monospermum	Myrtaceae	3	0.333742	0.0345702	0.18439	0.0285456	0.518131	0.0550563	0.0306583	0.00395375	0.27205	0.0222089	0.302708	0.0182552	0.1499	0.0524744	0.0292604	0.01271	0.17916	0.0403589	not observed	na	not observed	na	0.30131	0.0116848	0.00109208	0.0004476	147.76	54.8136	9.08697e-06	7.48714e-06	44.1584	8.14895	1.05393	0.776244	0.611989	0.01046	9.6	3.70405	17	7545.94	3598.07	5533.12	594.669		0.89792
Cape Tribulation	Tropical rainforest	Syzygium sayeri	Myrtaceae	3	0.279854	0.0502031	0.219136	0.0496162	0.49899	0.00296479	0.0557818	0.0273926	0.190118	0.0273341	0.2459	0.029602	0.193626	0.0235879	0.0614836	0.018197	0.25511	0.0279475	not observed	na	not observed	na	0.251602	0.0395287	0.00156576	0.000606136	134.967	47.6913	1.34047e-05	8.20054e-06	52.2784	8.61685	0.459615	0.150876	0.488613	0.0392378	32.9667	1.77858	35	5351.29	2544.98	2262.7	840.637		0.775312
Cape Tribulation	Tropical rainforest	Toechima erythrocarpum	Sapindaceae	3	0.055111	0.0315068	0.15426	0.00695042	0.209371	0.0354926	0.281657	0.0418314	0.355071	0.0631432	0.636728	0.030925	0.12013	0.00454242	0.0337702	0.00787381	0.1539	0.0110942	not observed	na	not observed	na	0.388841	0.0705982	0.00118829	0.000253128	104.025	20.7065	1.20006e-05	4.37111e-06	51.7046	8.76078	4.57311	2.91549	0.570085	0.0328207	15.9333	0.960902	20	6900.96	2864.74	3581.39	1219.02		0.555828
Cape Tribulation	Tropical rainforest	Wrightia laevis	Apocynaceae	3	0.144246	0.00327081	0.248575	0.02833	0.392821	0.0250598	0.209492	0.019887	0.149335	0.0222386	0.358827	0.0311011	0.191229	0.0354495	0.0571231	0.0109008	0.248352	0.04252	not observed	na	not observed	na	0.206458	0.0169164	0.00167027	0.000228739	114.002	5.52795	1.4612e-05	1.30686e-06	52.522	2.87229	1.26261	0.698439	0.381581	0.0357299	19.9	1.75784	40	6695.76	2183.06	3179.8	410.693		0.415556
Thredbo	Temperate forest	Acacia dealbata	Fabaceae	3	0.160799	0.050123	0.083909	0.0258927	0.244708	0.04596	0.232155	0.0756296	0.374122	0.0329151	0.606276	0.0818608	0.115384	0.0231107	0.0336315	0.0163559	0.149016	0.0359101	not observed	na	not observed	na	0.407753	0.0382399	0.00151034	0.000276951	79.2798	25.3534	2.16845e-05	1.25281e-05	55.8731	4.43273	1.29994	0.412668	0.533157	0.0347607	4.33333	0.602771	30	5318.34	1723.94	11131	6765.49		0.622259
Thredbo	Temperate forest	Acacia melanoxylon	Fabaceae	3	0.184476	0.0109366	0.0762678	0.0240845	0.260744	0.0336201	0.259811	0.0443323	0.38905	0.0288785	0.648862	0.0161456	0.0684093	0.0461414	0.0219845	0.00879684	0.0903938	0.0497587	not observed	na	not observed	na	0.411035	0.0315325	0.00124795	7.47032e-05	54.1171	34.2211	2.90116e-05	1.51298e-05	51.8071	3.99513	0.541558	0.252808	0.508736	0.00129867	3.1	0.556776	30	3635.61	1686.04	11072.8	2760.1		0.600538
Thredbo	Temperate forest	Acacia obliquinervia	Fabaceae	3	0.108917	0.0320387	0.0600472	0.011001	0.168964	0.0414793	0.243298	0.0899325	0.497162	0.0485049	0.74046	0.0534282	0.0693495	0.0198062	0.0212267	0.00510022	0.0905762	0.024114	not observed	na	not observed	na	0.518389	0.0526706	0.00130197	0.000418843	58.8597	27.2049	3.10056e-05	2.89834e-05	51.3826	5.44143	0.570592	0.18667	0.562351	0.0509509	4.36667	0.568624	15	3926.24	550.215	8411.56	7246.31		0.67541
Thredbo	Temperate forest	Coprosma hirtella	Rubiaceae	3	0.140849	0.0389772	0.246897	0.0291232	0.387746	0.0666435	0.073973	0.0346227	0.385179	0.088848	0.459152	0.111756	0.0748058	0.0357384	0.0507311	0.0210546	0.125537	0.0567503	0.0275655	0.0157458	not observed	na	0.43591	0.0679914	0.000374231	7.91275e-05	196.16	67.2831	2.0195e-06	7.00433e-07	25.8699	3.67298	0.517185	0.417495	0.600797	0.0529671	1.43333	0.057735	2	1640.13	377.108	8994.59	2517.69		0.840834
Thredbo	Temperate forest	Eucalyptus pauciflora	Myrtaceae	3	0.0547389	0.0234145	0.131338	0.0274439	0.186077	0.0251451	0.200495	0.0219856	0.463101	0.0343553	0.663596	0.0324736	0.0886901	0.0312954	0.025417	0.00964111	0.114107	0.0380435	0.0362209	0.0269209	not observed	na	0.488518	0.03233	0.00148683	5.21663e-05	59.7981	21.7903	2.68809e-05	8.33026e-06	52.1842	1.50363	0.772858	0.344414	0.608633	0.0199547	7.76667	1.50111	20	2703.65	565.412	7963.56	3658.53		0.697623
Thredbo	Temperate forest	Eucalyptus sp.	Myrtaceae	3	0.0730745	0.0217356	0.135996	0.0466363	0.209071	0.0454305	0.102844	0.0160231	0.451835	0.0684561	0.554679	0.0525765	0.14142	0.0576034	0.0315186	0.0105607	0.172939	0.0679086	0.0633114	0.0264693	not observed	na	0.483354	0.0579612	0.00144885	9.96895e-05	97.5637	39.1808	1.72178e-05	8.85175e-06	55.1344	1.7796	0.376729	0.158295	0.607163	0.0265911	22	6.55744	25	5412.54	1500.3	3049.17	627.947		0.811676
Thredbo	Temperate forest	Exocarpos strictus	Santalaceae	3	0.117022	0.0540488	0.238475	0.0675534	0.355497	0.0210777	0.0964712	0.0499275	0.357777	0.0530165	0.454248	0.084238	0.114599	0.0434568	0.0422085	0.0195111	0.156807	0.0550439	0.0334476	0.0374195	not observed	na	0.399986	0.0549844	0.000470574	3.4311e-05	242.348	83.1136	2.13156e-06	8.62092e-07	29.2649	1.11014	0.356571	0.208825	0.603843	0.0273787	1.16667	0.152753	3.5	2591.1	533.523	6042.55	2372.7		0.792795
Thredbo	Temperate forest	Hakea lissosperma	Proteaceae	3	0.0922892	0.0139341	0.209323	0.0444045	0.301612	0.0575141	0.0786437	0.00760298	0.349003	0.0592872	0.427647	0.0642104	0.11393	0.0221054	0.066199	0.00564766	0.180129	0.0233064	0.0906118	0.0172744	not observed	na	0.415202	0.0575756	0.000258738	2.50525e-05	437.618	42.0119	5.91216e-07	1.4969e-09	22.1095	1.18071	1.22643	0.335757	0.539506	0.0119519	1.96667	0.208167	5	995.432	216.435	8292.47	4540.31		0.814336
Thredbo	Temperate forest	Hakea microcarpa	Proteaceae	3	0.0962529	0.0247522	0.318138	0.0423484	0.41439	0.0216978	0.0517482	0.0201386	0.300954	0.0462114	0.352702	0.0663245	0.0818635	0.00817595	0.0412872	0.00802507	0.123151	0.0158894	0.109757	0.0409783	not observed	na	0.342241	0.0441345	0.000219985	1.78344e-05	372.152	21.7165	5.92492e-07	5.79948e-08	18.9315	1.76754	0.161399	0.111369	0.607667	0.0197398	1.7	0.264575	2	838.414	312.905	7065.81	523.036		0.856684
Thredbo	Temperate forest	Leionema phylicifolium	Proteaceae	3	0.0499262	0.00605785	0.154889	0.0138772	0.204815	0.0184392	0.131133	0.0266093	0.350787	0.0841989	0.48192	0.075696	0.108678	0.0107489	0.0677264	0.0184923	0.176405	0.0125571	0.13686	0.0617196	not observed	na	0.418513	0.0727845	0.000313941	4.90022e-05	348.409	24.1255	9.10112e-07	2.05223e-07	22.6938	1.90694	0.316961	0.270649	0.609323	0.0221736	1.26667	0.404145	1.27	1993.83	388.23	9520.87	4329.34		0.721657
Thredbo	Temperate forest	Lomatia myricoides	Proteaceae	3	0.0689061	0.030498	0.220632	0.0250786	0.289538	0.0535368	0.0779853	0.0229	0.411728	0.0720684	0.489713	0.0500116	0.14753	0.0342849	0.0364132	0.0140398	0.183943	0.0459973	0.036806	0.0246467	not observed	na	0.448141	0.0583352	0.000503081	6.66505e-05	295.951	79.7833	1.78752e-06	5.24805e-07	31.5192	2.27058	0.802625	0.378176	0.562021	0.025765	2.53333	0.251661	6	3310.45	1132.01	4751.55	2710.86		0.83658
Thredbo	Temperate forest	Olearia megalophylla	Asteraceae	3	0.149316	0.0223717	0.0612008	0.0181798	0.210517	0.0255356	0.145768	0.0404552	0.348661	0.0545303	0.494429	0.0911527	0.0878069	0.0249365	0.053646	0.0192524	0.141453	0.0353785	0.153601	0.0533416	not observed	na	0.402307	0.0383384	0.000272298	2.9812e-05	325.879	97.0432	9.08069e-07	3.85249e-07	23.0445	1.43977	1.32353	0.510852	0.617557	0.0510644	1.16667	0.152753	2	1820.2	319.719	11778.2	4811.47		0.708136
Thredbo	Temperate forest	Olearia phlogopappa	Asteraceae	3	0.0646844	0.0332814	0.151707	0.0137271	0.216392	0.0412203	0.141636	0.0588685	0.456471	0.0678419	0.598107	0.0599499	0.058901	0.0110746	0.0295058	0.0112998	0.0884067	0.0136107	0.0970947	0.032766	not observed	na	0.485977	0.064835	0.000301273	3.74732e-05	194.513	12.4859	1.54525e-06	1.02317e-07	23.5292	2.095	1.42746	0.864437	0.618002	0.0134662	1.43333	0.152753	1	2357.08	539.226	7472.98	846.681		0.764258
Thredbo	Temperate forest	Ozothamnus secundiflorus	Asteraceae	3	0.114412	0.0597509	0.15892	0.0530849	0.273333	0.0603544	0.165447	0.0366716	0.383404	0.0632368	0.548851	0.097154	0.0877935	0.0267183	0.0356329	0.00307188	0.123426	0.025438	0.0543899	0.0299597	not observed	na	0.419037	0.0659485	0.000335982	2.54591e-05	266.392	101.125	1.4138e-06	6.19185e-07	24.8133	1.31091	1.62101	0.512322	0.571858	0.0138599	1.76667	0.208167	2	1994	1239.72	2712.45	3829.01		0.699777
Thredbo	Temperate forest	Persoonia subvelutina	Proteaceae	3	0.1017	0.0357397	0.096389	0.0542439	0.198089	0.0236804	0.133348	0.0570049	0.382236	0.0245678	0.515585	0.0761327	0.177961	0.0094564	0.0697411	0.0344039	0.247703	0.0420746	0.0386239	0.0190951	not observed	na	0.451977	0.026911	0.000503803	8.3002e-05	360.745	69.2904	1.46946e-06	5.72252e-07	30.6294	2.37303	1.18888	0.245725	0.548154	0.0238237	2.06667	0.11547	2.07	2223.82	288.761	9886.17	3556.5		0.747721
Thredbo	Temperate forest	Pimelea linifolia	Ericaceae	3	0.0487097	0.0208648	0.121931	0.0190518	0.170641	0.00290448	0.166436	0.0271285	0.31995	0.0517341	0.486385	0.0294791	0.128937	0.00588446	0.0626941	0.0114814	0.191632	0.0105649	0.151342	0.0358264	not observed	na	0.382644	0.0626622	0.000254346	4.75525e-05	515.692	70.4405	5.08939e-07	1.7269e-07	19.9423	2.81631	0	0	0.497811	0.0103205	1.76667	0.404145	1.77	1701.69	516.472	7735.96**	5784.67		0.655354
Thredbo	Temperate forest	Polyscias sambucifolia	Araliaceae	3	0.0302984	0.0123592	0.222046	0.028454	0.252344	0.0174996	0.0770919	0.00747268	0.325028	0.049516	0.40212	0.0546421	0.210576	0.0408359	0.0893141	0.0398945	0.29989	0.0499834	0.045646	0.0330462	not observed	na	0.414342	0.0212065	0.000292123	6.71624e-05	730.704	132.873	4.12693e-07	1.37249e-07	22.711	3.02718	2.46165	0.45681	0.551044	0.00433627	2.7	0.264575	5	4396.58	512.063	7353.14	791.889		0.807006
Blencoe Falls	Tropical woodland	Corymbia citridora	Myrtaceae	3	0.0731606	0.0304943	0.108403	0.0251666	0.181564	0.0439026	0.0909672	0.00675018	0.523711	0.0590035	0.614678	0.0605027	0.15464	0.0324321	0.0386427	0.00941086	0.193283	0.0357591	0.0104756	0.0141318	not observed	na	0.562353	0.0496619	0.001753	0.000306849	87.8996	3.40728	1.98933e-05	2.88363e-06	65.9227	2.53944	0.132497	0.0685431	0.622922	0.0459585	7.53333	1.89033	35	10830	770.36	6509.08	358.207		0.851302
Blencoe Falls	Tropical woodland	Corymbia clarksoniana	Myrtaceae	3	0.0600567	0.0281635	0.060672	0.0072124	0.120729	0.0350052	0.152622	0.0223885	0.444667	0.100605	0.597289	0.0832724	0.203051	0.0385227	0.0394646	0.0153098	0.242516	0.0353913	0.0394667	0.0203779	not observed	na	0.484132	0.110276	0.00148141	0.000362991	144.069	47.924	1.19277e-05	7.68e-06	67.6112	4.95065	0.453515	0.223831	0.549049	0.036002	4.4	2.09523	25	8996.42	3678.71	4673.89	2261.47		0.738018
Blencoe Falls	Tropical woodland	Eucalyptus sp.	Myrtaceae	3	0.112799	0.0352078	0.0898	0.0215401	0.202599	0.014924	0.204555	0.0103557	0.332954	0.0350322	0.537509	0.0247354	0.179787	0.00440527	0.0229028	0.00408882	0.20269	0.00731603	0.057202	0.0376112	not observed	na	0.355857	0.038408	0.00209763	0.00037858	87.566	15.4408	2.50411e-05	9.26116e-06	67.579	6.57605	0.594991	0.305958	0.504805	0.0515646	3.43333	1.0504	25	7781.63	1306.46	6474.53	1732.31		0.61832
Blencoe Falls	Tropical woodland	Grevillea glauca*	Proteaceae	1	0.130564	na	0.308605	na	0.439169	na	0.0474777	na	0.344214	na	0.391691	na	0.130564	na	0.0385757	na	0.169139	na	not observed	na	not observed	na	0.382789	na	0.00125742	na	103.834	na	1.21099e-05	na	56.8906	na	0.731363	na	0.606079	na	3.6	na	10	5369.01	na	3017.24	na		0.878788
Blencoe Falls	Tropical woodland	Grevillea parallela	Proteaceae	3	0.259594	0.0526538	0.257557	0.0551312	0.517151	0.0364215	0.0235442	0.0122721	0.280156	0.0315119	0.3037	0.0432726	0.135251	0.0177682	0.0384252	0.0171847	0.173676	0.0326264	0.00547333	0.0020807	not observed	na	0.318581	0.0327044	0.00156869	0.0004508	94.9692	45.7348	2.01786e-05	1.14192e-05	67.5453	5.11217	0	0	0.596943	0.0395434	5.16667	0.70946	15	5413.47	255.904	3380.15	1040.38		0.925058
Blencoe Falls	Tropical woodland	Lophostemon suaveolens	Myrtaceae	3	0.163961	0.0417109	0.218203	0.0398379	0.382164	0.0814241	0.0896295	0.0169722	0.240425	0.0527799	0.330055	0.0669608	0.179245	0.0178592	0.0466118	0.0144669	0.225856	0.0256763	0.0619252	0.0106463	not observed	na	0.287037	0.0499434	0.00122279	8.04704e-05	146.403	6.33769	8.35204e-06	4.22488e-07	53.4016	4.6485	1.84113	1.14025	0.525101	0.0176196	2.23333	0.288675	20	3699.97	1273.89	3365.65	221.75		0.72735
Blencoe Falls	Tropical woodland	Melaleuca nervosa	Myrtaceae	3	0.197218	0.0367457	0.155697	0.0236339	0.352915	0.0602998	0.0797899	0.0248246	0.290394	0.0108505	0.370183	0.031955	0.157722	0.0174199	0.047905	0.0339551	0.205627	0.045086	0.071275	0.0513456	not observed	na	0.338299	0.0288484	0.00152537	0.000127098	103.463	9.24657	1.48262e-05	1.88358e-06	60.4583	1.87889	0.687197	0.426155	0.564968	0.0544807	3.5	0.781025	10	5399.69	1674.86	2074.73	177.914		0.787243
Blencoe Falls	Tropical woodland	Melaleuca viridiflora	Myrtaceae	3	0.0877088	0.01638	0.163374	0.0214259	0.251083	0.0359435	0.0809772	0.0241195	0.379168	0.0673708	0.460146	0.0658457	0.168173	0.0409946	0.0487127	0.0290663	0.216886	0.0697597	0.0718861	0.00457802	not observed	na	0.427881	0.0403929	0.00126458	7.19349e-05	132.788	29.877	9.81109e-06	2.0479e-06	54.7035	0.327327	2.19697	0.951203	0.557245	0.0146957	3.01667	0.246644	10	4942.27	2250.7	1555.27	214.152		0.821763
Blencoe Falls	Tropical woodland	Persoonia falcata	Proteaceae	3	0.129344	0.0190596	0.0716308	0.0170966	0.200975	0.0320516	0.112319	0.00823529	0.41767	0.114262	0.52999	0.107217	0.143299	0.03514	0.0679086	0.0250448	0.211208	0.0522606	0.0578282	0.0254709	not observed	na	0.485579	0.0914578	0.00106091	0.000249968	135.158	16.4297	7.92405e-06	2.16554e-06	53.7119	8.24651	1.93239	0.240094	0.578907	0.0209986	4	0.3	9	4092.96	1891.52	4790.84	1468.45		0.78022
Blencoe Falls	Tropical woodland	Pimelea linifolia	Thymelaeaceae	3	0.044318	0.010871	0.0726504	0.0453816	0.116968	0.0387523	0.322132	0.0198285	0.324451	0.0701481	0.646583	0.0698246	0.124792	0.0546288	0.0602461	0.0257521	0.185038	0.0598303	0.0514102	0.0224308	not observed	na	0.384697	0.0846935	0.000446366	3.29837e-05	275.378	100.349	1.73653e-06	4.99818e-07	28.9335	2.13923	0.697983	1.06429	0.441988	0.0534331	0.7	0.1	1.5	1922.07	620.334	3511.39686*	na		0.497928
Blencoe Falls	Tropical woodland	Xylomelum scottianum	Proteaceae	3	0.25383	0.0645155	0.279838	0.044191	0.533668	0.0757967	0.0202548	0.00880622	0.306935	0.0479042	0.32719	0.047559	0.120324	0.0421549	0.0163957	0.0128588	0.13672	0.0513616	0.00242272	0.00210188	not observed	na	0.323331	0.0573485	0.0019123	0.000573672	62.689	13.6454	3.11936e-05	1.01365e-05	64.6833	9.46311	0.364268	0.215488	0.615076	0.0440009	3.8	0.52915	10	4301.24	496.689	1734.69	635.523		0.937136
[truncated: 11 more columns]
